# Supplementary material for: Stem cell-derived tissue-associated regulatory T cells ameliorate the development of autoimmunity
Source: PubMed Central journal article supplement (PMC4742827; doi:10.1038/srep20588), 2016-02-05
Supplement: srep20588-s1.pdf [file srep20588-s1.pdf]

## **Stem cell-derived tissue-associated regulatory T cells ameliorate the development of autoimmunity**

Mohammad Haque<sup>1, #</sup>, Jianyong Song<sup>2, #</sup>, Kristin Fino<sup>1</sup>, Praneet Sandhu<sup>1</sup>, Xinmeng Song<sup>1</sup>, Fengyang Lei<sup>1</sup>, Songguo Zheng<sup>3</sup>, Bing Ni<sup>2</sup>, Deyu Fang<sup>4</sup>, and Jianxun Song<sup>1</sup>

<sup>1</sup> Department of Microbiology and Immunology, The Pennsylvania State University College of Medicine, Hershey, PA 17033, USA

<sup>2</sup> Institutes of Irradiation/Immunology, The Third Military Medical University, Chongqing 400038, China

<sup>3</sup> Department of Medicine, The Pennsylvania State University College of Medicine, Hershey, PA 17033, USA

<sup>4</sup> Department of Pathology, Northwestern University Feinberg School of Medicine, Chicago, IL 60611, USA

# These authors contributed equally to this work

Normal (left knee)

MIDR (arthritis induced)

MiDR-TCR-FoxP3 (treated)

A

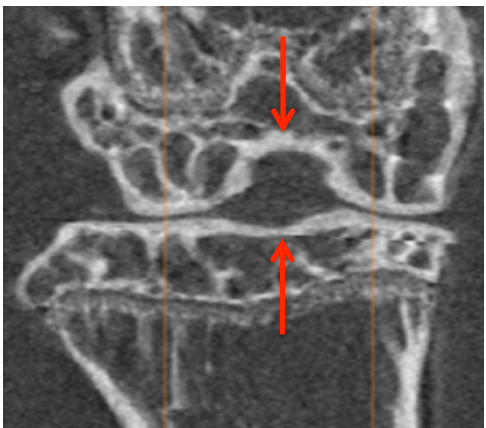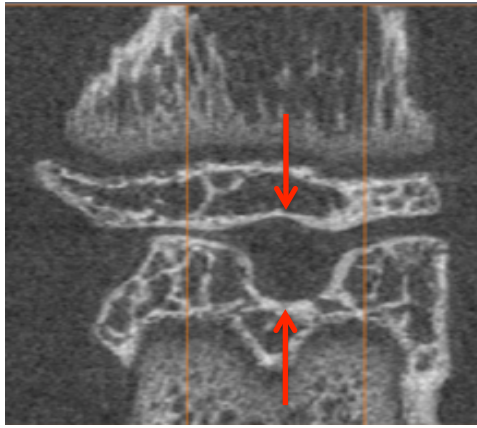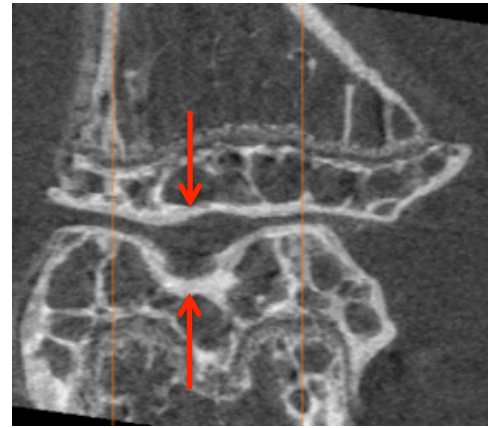

B

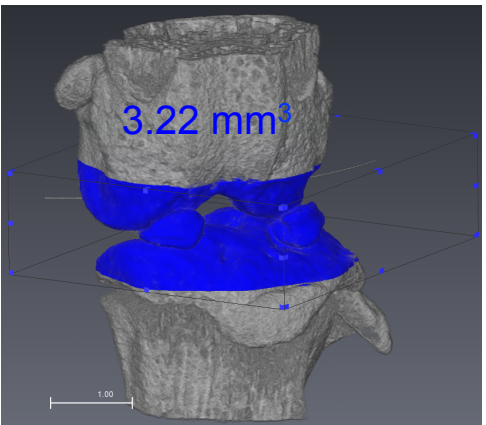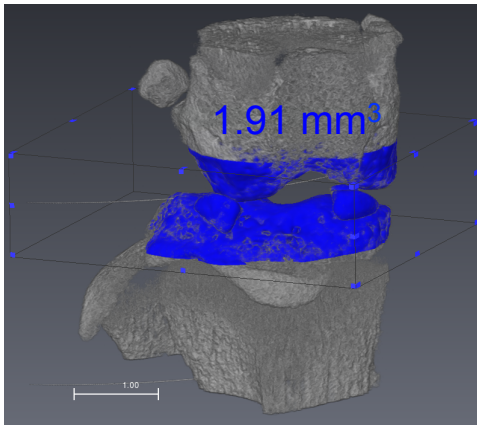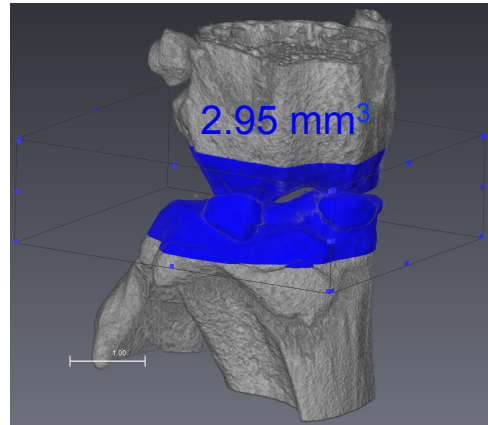

***In vivo* imaging of the bone architecture around the mouse knees by the high-resolution micro-computed tomography (micro-CT) system. (A)** The scans were performed with 2.2 mm length, and images were captured after further image processing (volume rendering and transformation). **(B)** Bone volume around knee joint was evaluated using three dimensional reconstruction of micro-CT images, and bone volume inside the volume of interest was calculated.
